# Supplementary material for: Therapeutic Potential of Bipolar Androgen Therapy for Castration-Resistant Prostate Cancer: In Vitro and In Vivo Studies
Source: MDPI journal article supplement (doi:10.3390/biomedicines12010181), 2024-01-15
Supplement: s1 [file s1]

**Supplemental Table S1.** Mean differences, 95% confidence intervals, and p-values between controls and t-implantation specimens

|               |                  | <b>Control – T-implantation</b> |                                 |          |
|---------------|------------------|---------------------------------|---------------------------------|----------|
| <b>Figure</b> | <b>Variable</b>  | <b>Mean difference</b>          | <b>95% CI of the difference</b> | <b>P</b> |
| Figure 4B     | PSA              | -2.12                           | (-2.87) – (-1.37)               | 0.037    |
| Figure 4D     | Tumor volume     | 396.56                          | 37.02 – 756.11                  | 0.034    |
| Figure 5B     | Ki-67            | 19.56                           | 1.33 – 37.80                    | 0.039    |
| Figure 5B     | Cell death index | -31.44                          | (-39.63) – (-23.24)             | <0.001   |
| Figure 5B     | Mitotic index    | 0.36                            | 0.04 – 0.67                     | 0.035    |
| Figure 5B     | AR in mitosis    | -0.10                           | (-0.16) – (-0.04)               | 0.005    |
